# Supplementary material
Source: publisher site journal article supplement (https://www.dovepress.com/article/288709)
Supplement: Supplementary file 1 [file get_supplementary_file.php]

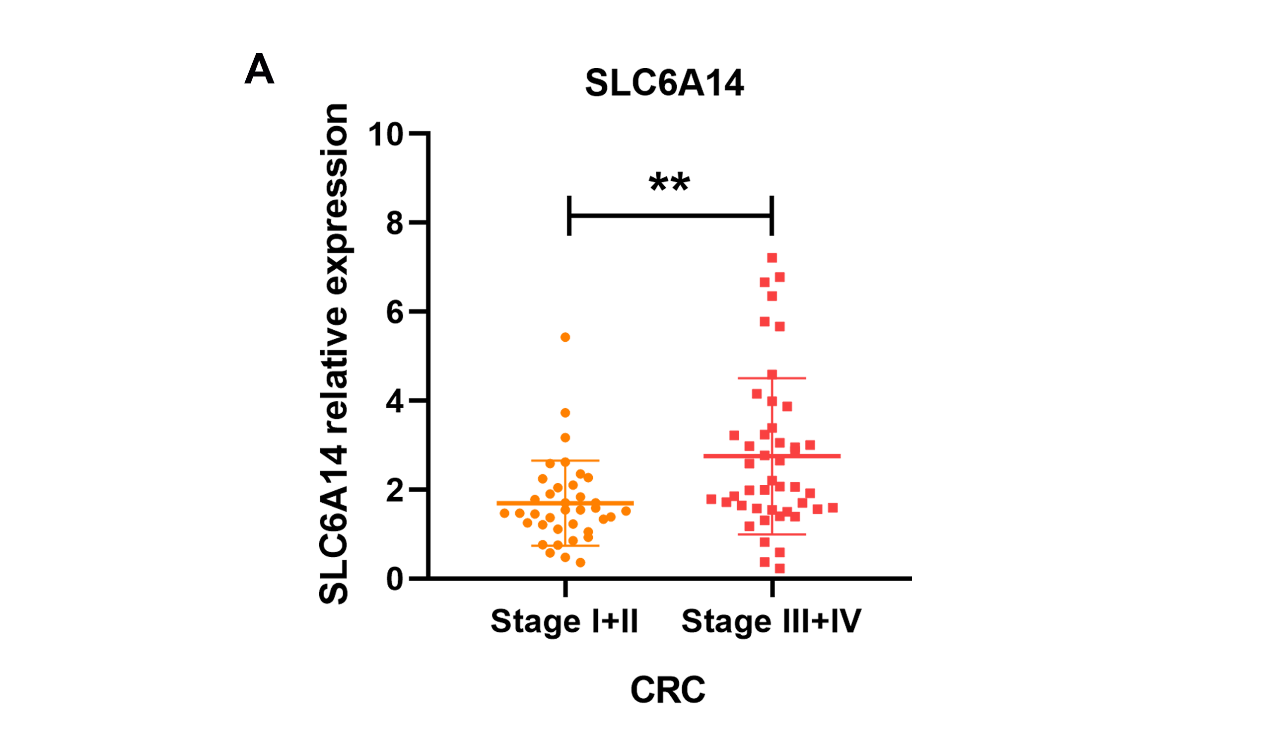


**Figure S1 High expression of SLC6A14 is positively related to clinical stages of CRC patients.** (**A**)The SLC6A14 expression in different stages of CRC tumor tissues. Bars in all graphs represented mean ± S.D.. **P < 0.01.

**
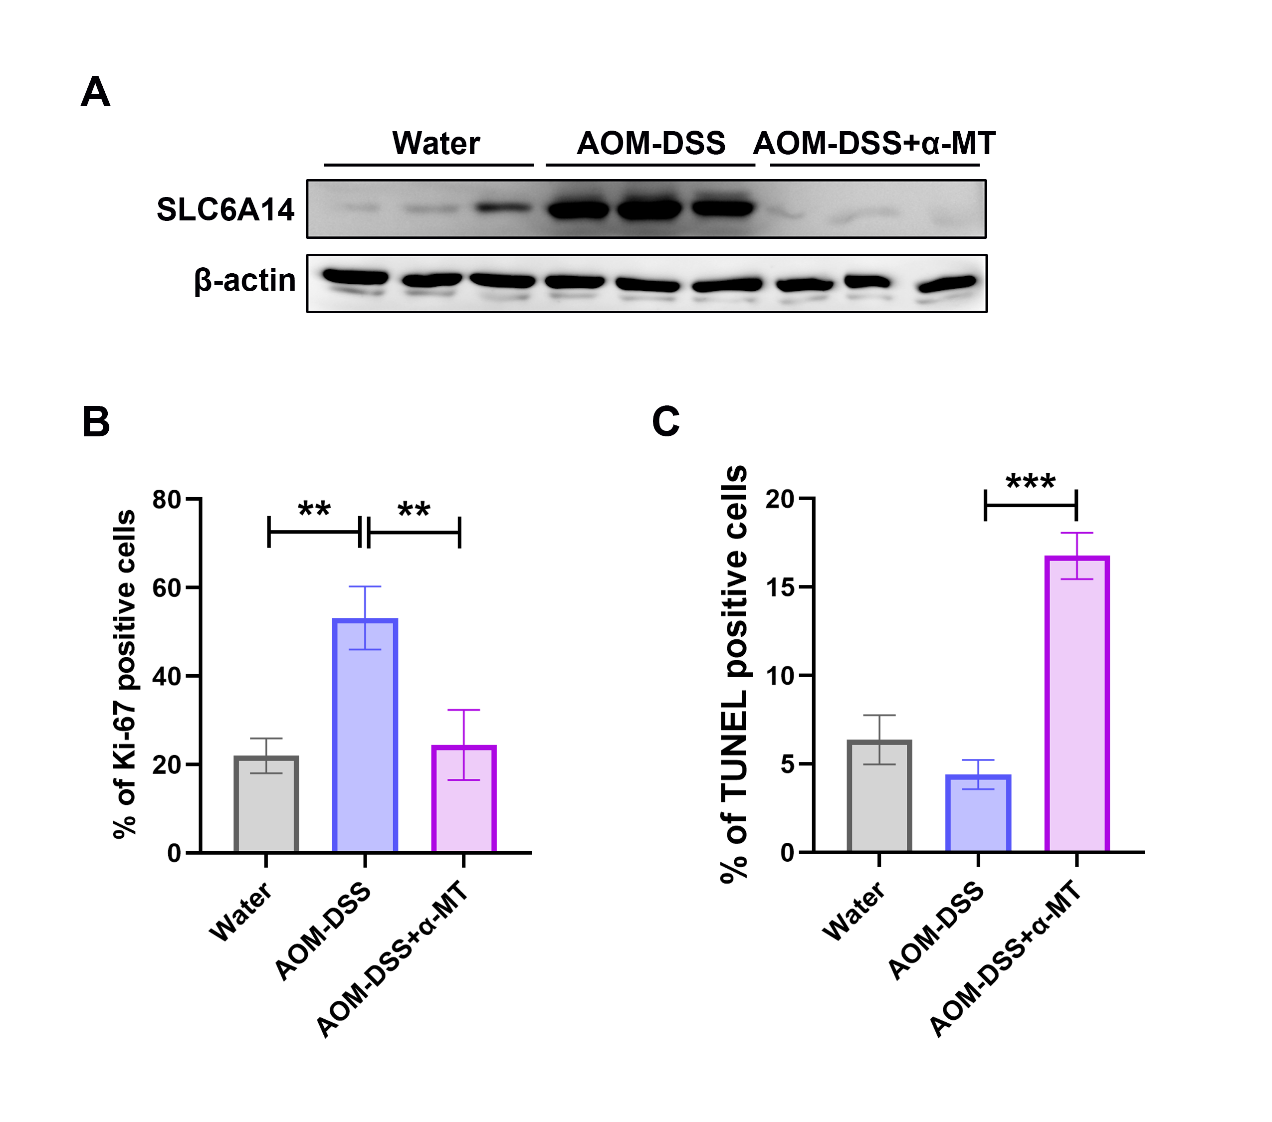
**

**Figure S2 Pharmacologic blockade of SLC6A14 with α-MT suppresses colitis-associated tumorigenesis in vivo. (A)** The western blot results of SLC6A14 expression in the colons of different treatment groups of mice. **(B)** The quantification of Ki-67 positive staining for the colons of mice in indicated groups. **(C)** The quantification of TUNEL positive staining in the colons of different treated mice. Bars in all graphs represented mean ± S.D.. **P < 0.01 and ***P < 0.001.


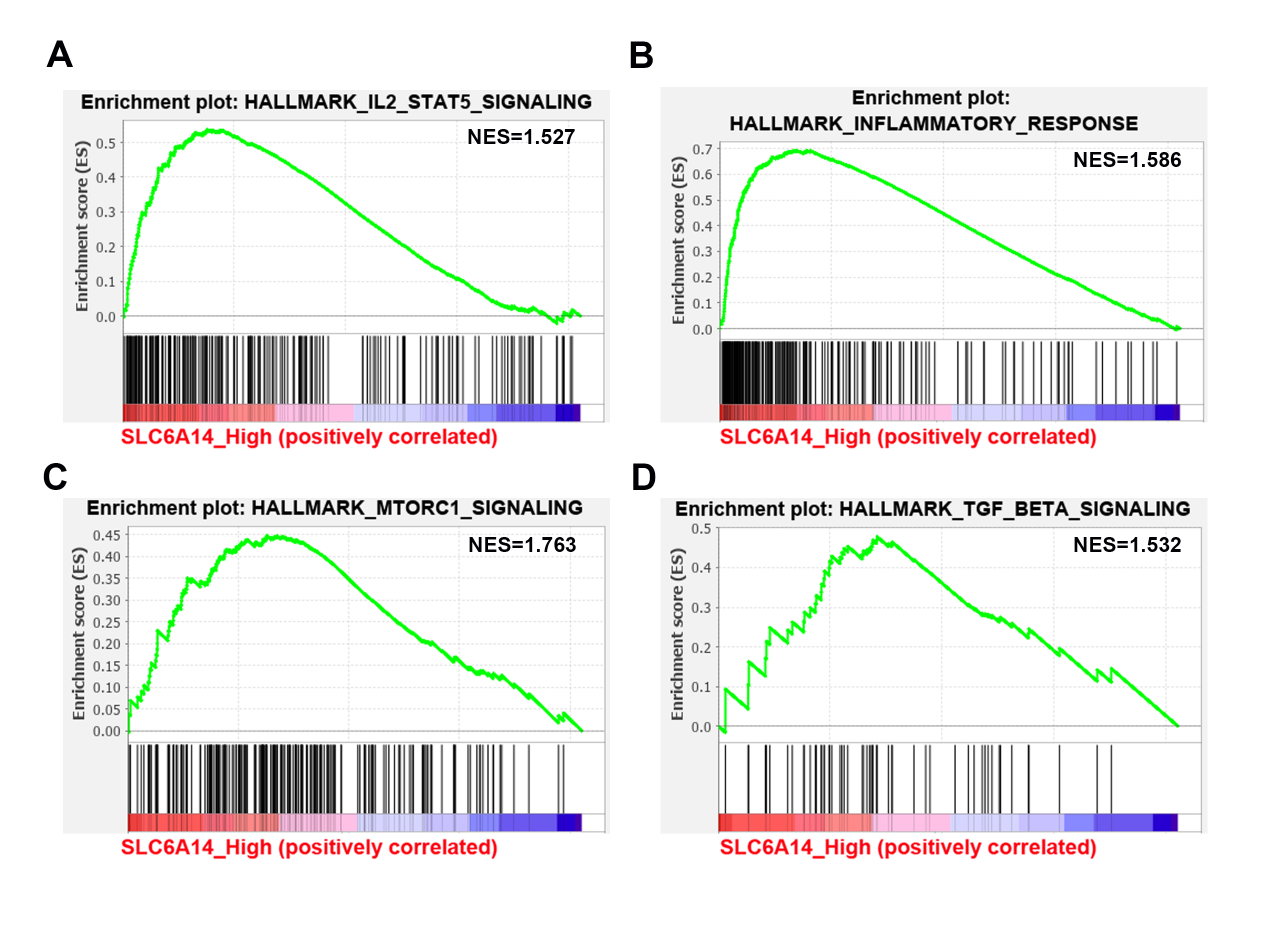


**Figure S3 GSEA enrichment analysis in CRC patients with SLC6A14 high expression to explore potential pathways correlated with SLC6A14. (A-D)** Some prominently altered pathways in CRC patients with high SLC6A14 expression using GSEA enrichment analysis.
